# Supplementary material
Source: publisher figshare collection journal article supplement (https://acs.figshare.com/ndownloader/files/4403935)
Supplement: Supplementary file 1 [file 4403935]

## **Supporting Information**

### **Solution Structure of Polytheonamide B, a Highly Cytotoxic Non-Ribosomal Polypeptide from Marine Sponge**

Toshiyuki Hamada, Shigeki Matsunaga, Masako Fujiwara, Kenichi Fujita, Hiroshi Hirota, Roland Schmucki, Peter Güntert, and Nobuhiro Fusetani

**The file contains Supporting Table T1 and Supporting Figures and Legends S1-S8.**

The Supporting Table T1 provides the  $^1\text{H}$  NMR chemical shift assignments of pTB in  $\text{CDCl}_3/\text{CD}_3\text{OH}$  (1:1, v/v). The Supporting Figures show  $^1\text{H}$ -NMR spectra in  $\text{CDCl}_3/\text{CD}_3\text{OH}$  (1:1, v/v) and  $\text{DMSO}-d_6$  (S1), DQF-COSY (S2), TOCSY (S3), and NOESY spectra (S4) together with secondary structure information of pTB (S5), representations of the NMR structures of pTB (S6 and S7) and a structural comparison of pTB with a gA channel (S8).

**Table T1. <sup>1</sup>H NMR chemical shifts of pTB in CDCl<sub>3</sub>/CD<sub>3</sub>OH (1:1, v/v)**

| residue | NH   | C <sub>α</sub> H | C <sub>β</sub> H | others                                                                                                                                               |
|---------|------|------------------|------------------|------------------------------------------------------------------------------------------------------------------------------------------------------|
| Gly-1   | 9.38 | 4.03,4.22        |                  |                                                                                                                                                      |
| Mil-2   | 7.70 | 4.84             |                  | C <sub>γ</sub> H <sub>3</sub> 0.90; C <sub>γ</sub> H <sub>3</sub> 0.92; C <sub>γ</sub> H <sub>2</sub> 1.33; C <sub>δ</sub> H <sub>3</sub> 0.82       |
| Gly-3   | 8.57 | 3.42, 4.53       |                  |                                                                                                                                                      |
| Tle-4   | 7.41 | 5.43             |                  | C <sub>γ</sub> H <sub>3</sub> 0.98                                                                                                                   |
| Tle -5  | 8.02 | 4.50             |                  | C <sub>γ</sub> H <sub>3</sub> 1.08                                                                                                                   |
| Tle -6  | 7.58 | 5.34             |                  | C <sub>γ</sub> H <sub>3</sub> 0.99                                                                                                                   |
| Ala-7   | 8.62 | 5.07             | 1.38             |                                                                                                                                                      |
| Tle -8  | 7.82 | 5.37             |                  | C <sub>γ</sub> H <sub>3</sub> 1.06                                                                                                                   |
| Tle -9  | 8.49 | 4.65             |                  | C <sub>γ</sub> H <sub>3</sub> 1.07                                                                                                                   |
| Ala-10  | 8.65 | 5.60             | 1.28             |                                                                                                                                                      |
| Gly-11  | 8.23 | 3.25, 5.36       |                  |                                                                                                                                                      |
| Ala-12  | 8.52 | 5.80             | 1.40             |                                                                                                                                                      |
| Tle -13 | 8.40 | 5.20             |                  | C <sub>γ</sub> H <sub>3</sub> 1.03                                                                                                                   |
| Ala-14  | 8.81 | 5.68             | 1.31             |                                                                                                                                                      |
| Asm-15  | 8.45 | 5.68             | 2.53, 3.25       | NH 7.92; C <sub>δ</sub> H <sub>3</sub> 2.62                                                                                                          |
| Mth-16  | 8.90 | 5.79             |                  | C <sub>γ</sub> H <sub>3</sub> 1.34                                                                                                                   |
| Gly-17  | 8.76 | 3.37, 5.21       |                  |                                                                                                                                                      |
| Ala-18  | 8.66 | 5.53             | 1.37             |                                                                                                                                                      |
| Gly-19  | 8.77 | 3.40, 5.48       |                  |                                                                                                                                                      |
| Tle -20 | 9.01 | 5.11             |                  | C <sub>γ</sub> H <sub>3</sub> 0.96                                                                                                                   |
| Asm-21  | 8.82 | 5.73             | 2.58, 3.21       | NH 8.36; C <sub>δ</sub> H <sub>3</sub> 2.69                                                                                                          |
| Mgn-22  | 9.58 | 5.12             | 2.49             | C <sub>γ</sub> H <sub>3</sub> 1.07; C <sub>γ</sub> H <sub>2</sub> 1.59, 2.62; NH <sub>2</sub> 5.97, 7.25                                             |
| Mth-23  | 9.02 | 5.46             |                  | C <sub>γ</sub> H <sub>3</sub> 1.40; C <sub>γ</sub> H <sub>3</sub> 1.40                                                                               |
| Ala-24  | 8.74 | 5.43             | 1.25             |                                                                                                                                                      |
| Gly-25  | 8.83 | 3.40, 5.46       |                  |                                                                                                                                                      |
| Gly-26  | 8.81 | 3.42, 5.24       |                  |                                                                                                                                                      |
| Asm-27  | 9.03 | 5.75             | 2.50, 3.27       | NH 8.46; C <sub>δ</sub> H <sub>3</sub> 2.70                                                                                                          |
| Ile-28  | 9.12 | 5.38             | 1.52             | C <sub>γ</sub> H <sub>3</sub> 0.96; C <sub>γ</sub> H <sub>2</sub> 1.06, 1.65; C <sub>δ</sub> H <sub>3</sub> 0.90                                     |
| Ham-29  | 8.98 | 5.79             | 4.43             | NH 8.12; C <sub>δ</sub> H <sub>3</sub> 2.68                                                                                                          |
| Tle -30 | 8.51 | 5.59             |                  | C <sub>γ</sub> H <sub>3</sub> 1.03                                                                                                                   |
| Mth-31  | 9.17 | 5.34             |                  | C <sub>γ</sub> H <sub>3</sub> 1.22; C <sub>γ</sub> H <sub>3</sub> 1.22                                                                               |
| Gly-32  | 8.47 | 3.41, 5.42       |                  |                                                                                                                                                      |
| Asm-33  | 9.00 | 5.87             | 2.51, 3.25       | NH 8.38; C <sub>δ</sub> H <sub>3</sub> 2.72                                                                                                          |
| Ile-34  | 9.16 | 5.08             | 1.54             | C <sub>γ</sub> H <sub>3</sub> 0.84; C <sub>γ</sub> H <sub>2</sub> 1.68; C <sub>δ</sub> H <sub>3</sub> 0.74                                           |
| Asm-35  | 8.90 | 5.76             | 2.53, 2.67       | NH 7.78; C <sub>δ</sub> H <sub>3</sub> 2.59                                                                                                          |
| Val-36  | 8.77 | 5.09             | 1.99             | C <sub>γ</sub> H <sub>3</sub> 0.83; C <sub>γ</sub> H <sub>3</sub> 1.01                                                                               |
| Ham-37  | 8.93 | 5.76             | 4.02             | NH 7.97; C <sub>δ</sub> H <sub>3</sub> 2.67                                                                                                          |
| Ala-38  | 8.57 | 5.37             | 1.19             |                                                                                                                                                      |
| Asm-39  | 8.62 | 5.79             | 2.43, 2.90       | NH 7.82; C <sub>δ</sub> H <sub>3</sub> 2.62                                                                                                          |
| Val-40  | 9.14 | 4.90             | 1.86             | C <sub>γ</sub> H <sub>3</sub> 0.80; C <sub>γ</sub> H <sub>3</sub> 0.83                                                                               |
| Ser-41  | 8.73 | 5.70             | 3.60, 3.85       |                                                                                                                                                      |
| Val-42  | 8.92 | 4.48             | 1.92             | C <sub>γ</sub> H <sub>3</sub> 0.88; C <sub>γ</sub> H <sub>3</sub> 0.88                                                                               |
| Asn-43  | 7.97 | 6.03             | 2.78, 2.59       | NH <sub>2</sub> 6.65, 7.42                                                                                                                           |
| Mms-44  | 8.82 | 4.73             |                  | C <sub>γ</sub> H <sub>3</sub> 1.40; C <sub>γ</sub> H <sub>3</sub> 1.17; C <sub>γ</sub> H <sub>2</sub> 2.58, 2.89; C <sub>ε</sub> H <sub>3</sub> 2.52 |
| Asn-45  | 8.33 | 5.79             | 2.59, 2.88       | NH <sub>2</sub> 6.71, 7.46                                                                                                                           |
| Gln-46  | 9.13 | 4.68             | 1.78             | C <sub>γ</sub> H <sub>2</sub> 2.05, 2.23; NH <sub>2</sub> 6.29, 7.06                                                                                 |
| Ath -47 | 8.35 | 5.29             | 3.98             | C <sub>γ</sub> H <sub>3</sub> 1.23                                                                                                                   |
| Thr-48  | 8.72 | 4.71             | 4.30             | C <sub>γ</sub> H <sub>3</sub> 1.26                                                                                                                   |

**Figure S1**

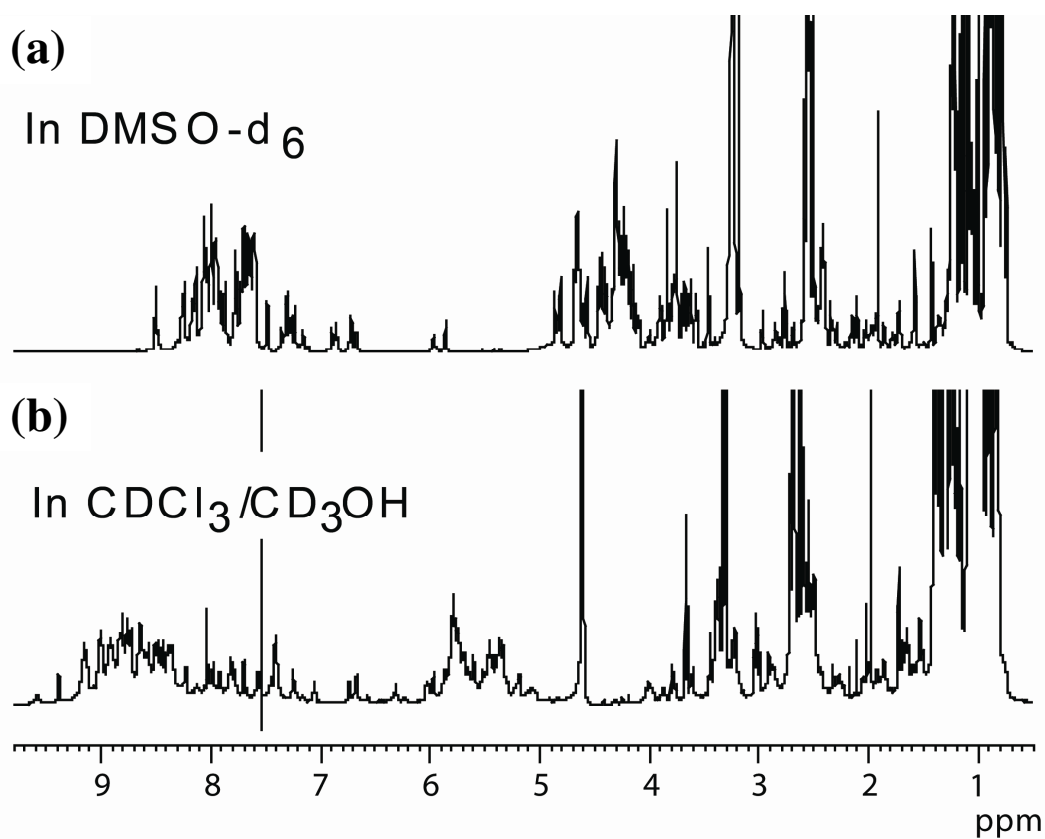

**$^1H$  NMR spectra of pTB in DMSO- $d_6$  (a) and in  $CDCl_3/CD_3OH$  (1:1, v/v) (b).**

The larger chemical shift dispersion in the  $^1H$ -NMR spectrum of pTB in  $CDCl_3/CD_3OH$  (1:1, v/v) than in DMSO- $d_6$  indicates a well established structure of the protein in methanol/chloroform mixture.

Figure S2

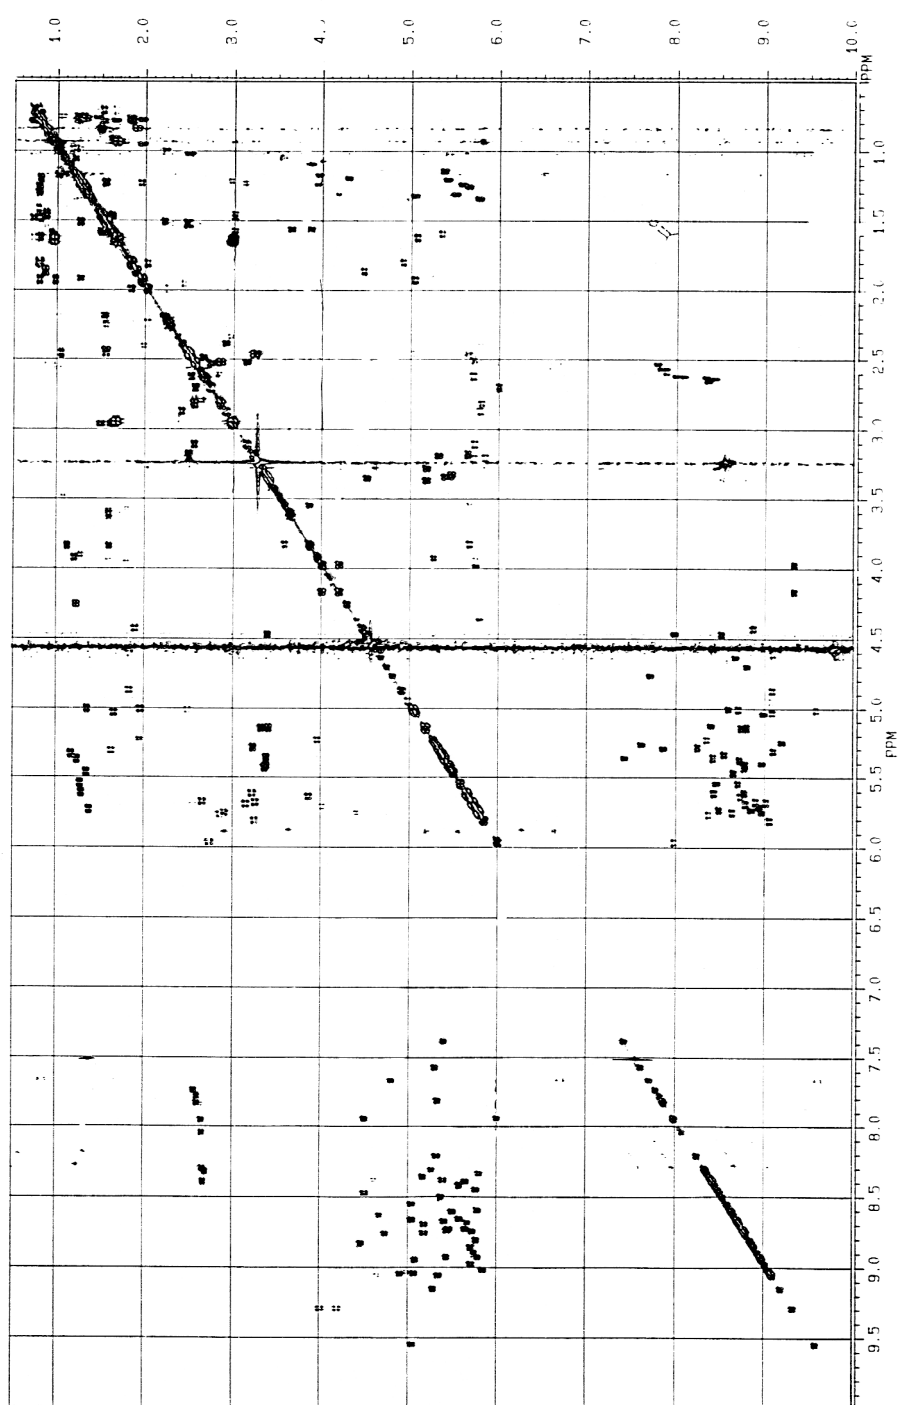

DQF-COSY spectrum of pTB in CDCl<sub>3</sub>/CD<sub>3</sub>OH (1:1, v/v).

**Figure S3**

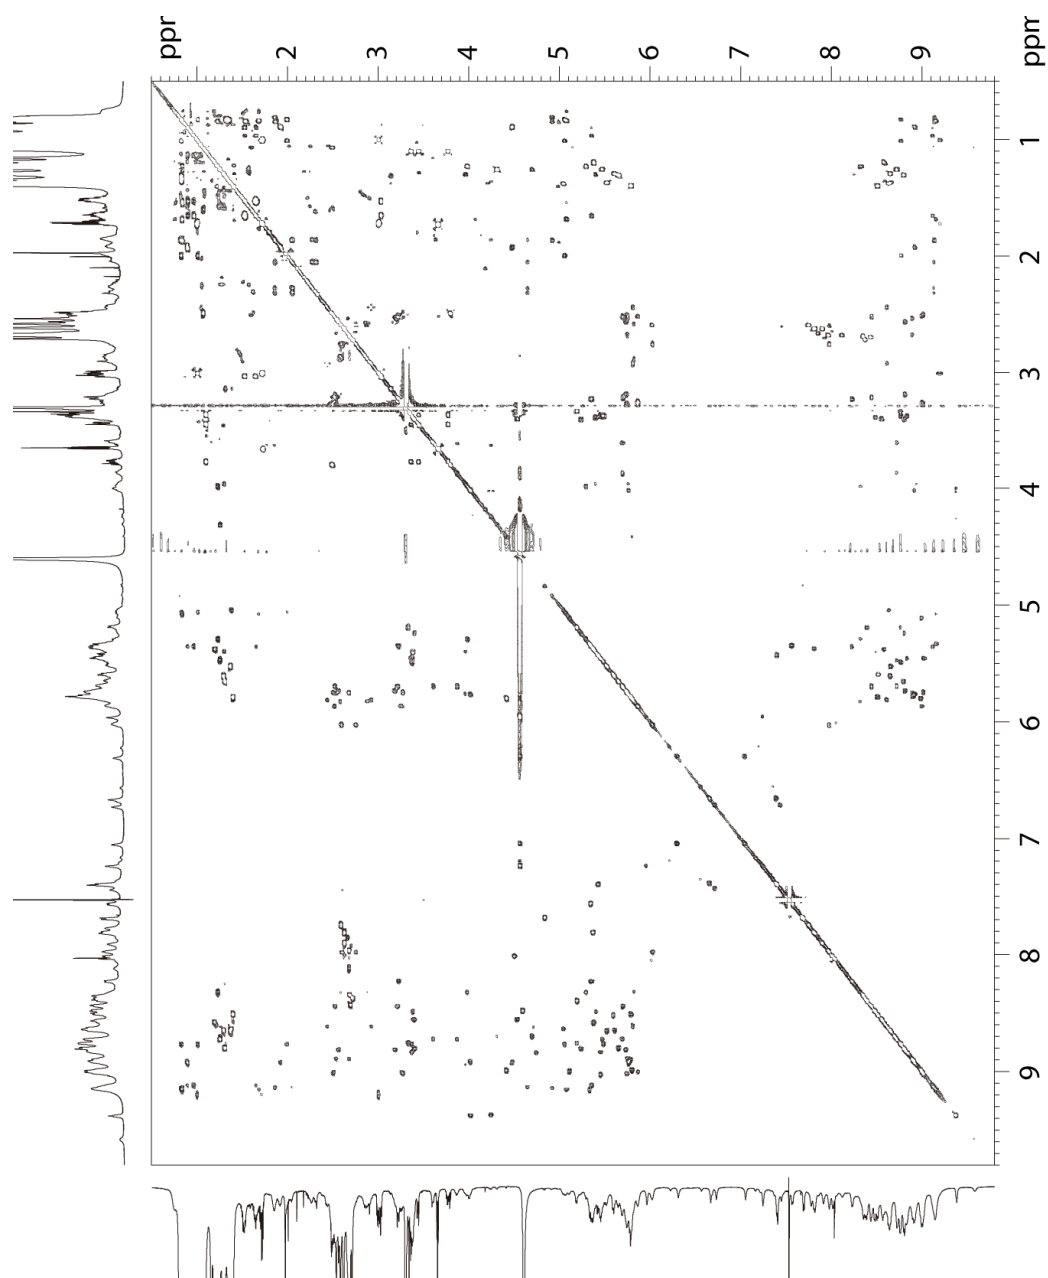

**TOCSY spectrum of pTB in  $\text{CDCl}_3/\text{CD}_3\text{OH}$  (1:1, v/v) with a spin-lock time of 100 ms.**

**Figure S4**

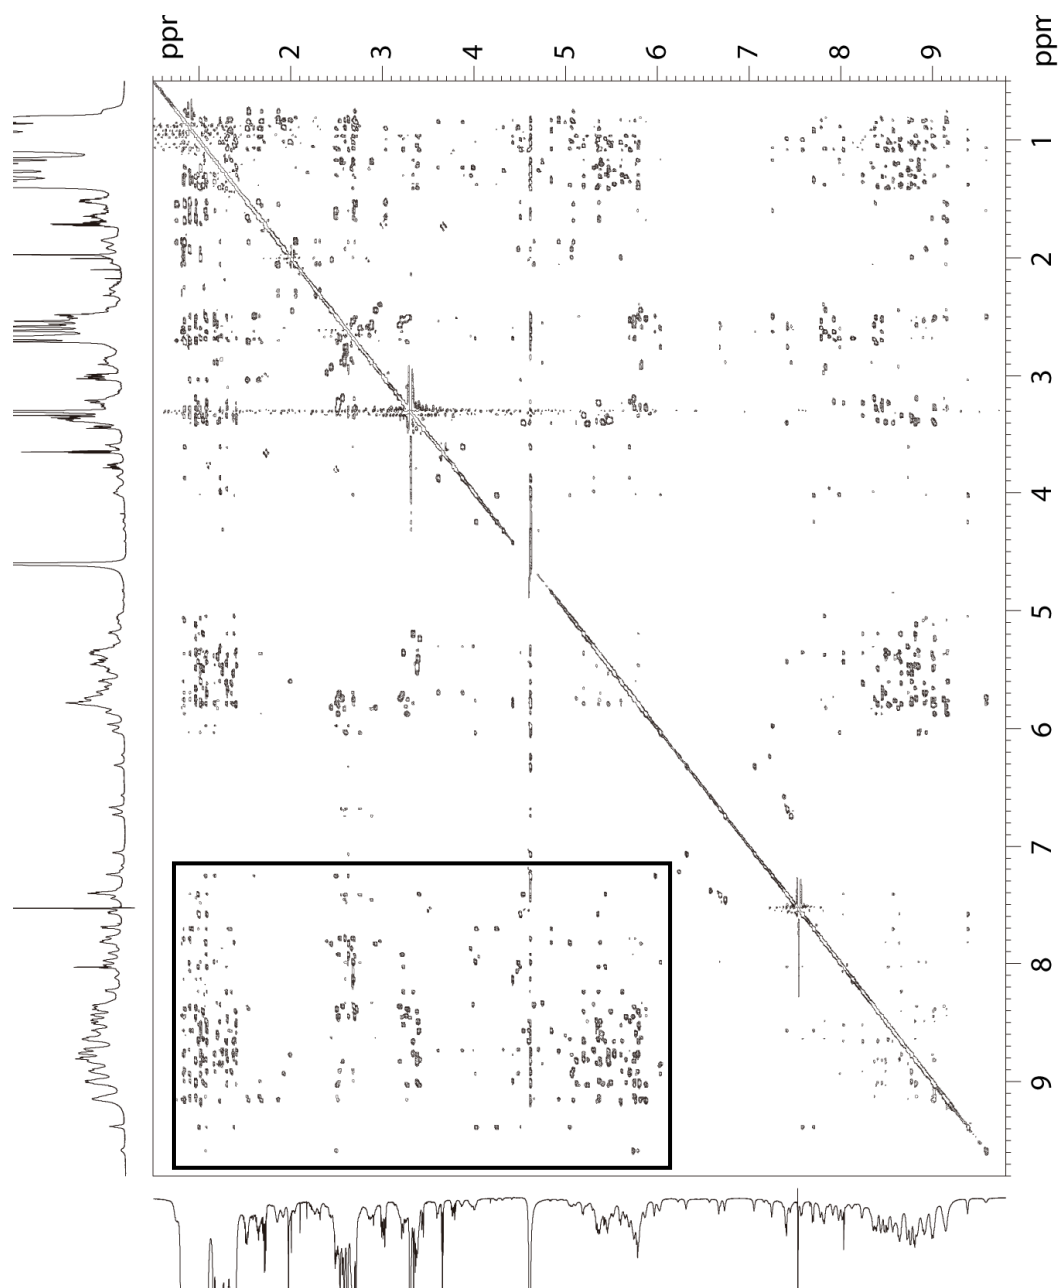

**NOESY spectrum of pTB in CDCl<sub>3</sub>/CD<sub>3</sub>OH (1:1, v/v)**

The mixing time in the experiment was 200 ms. The boxed region of the NOESY spectrum is shown in Fig. 2 of this article.

Figure S5

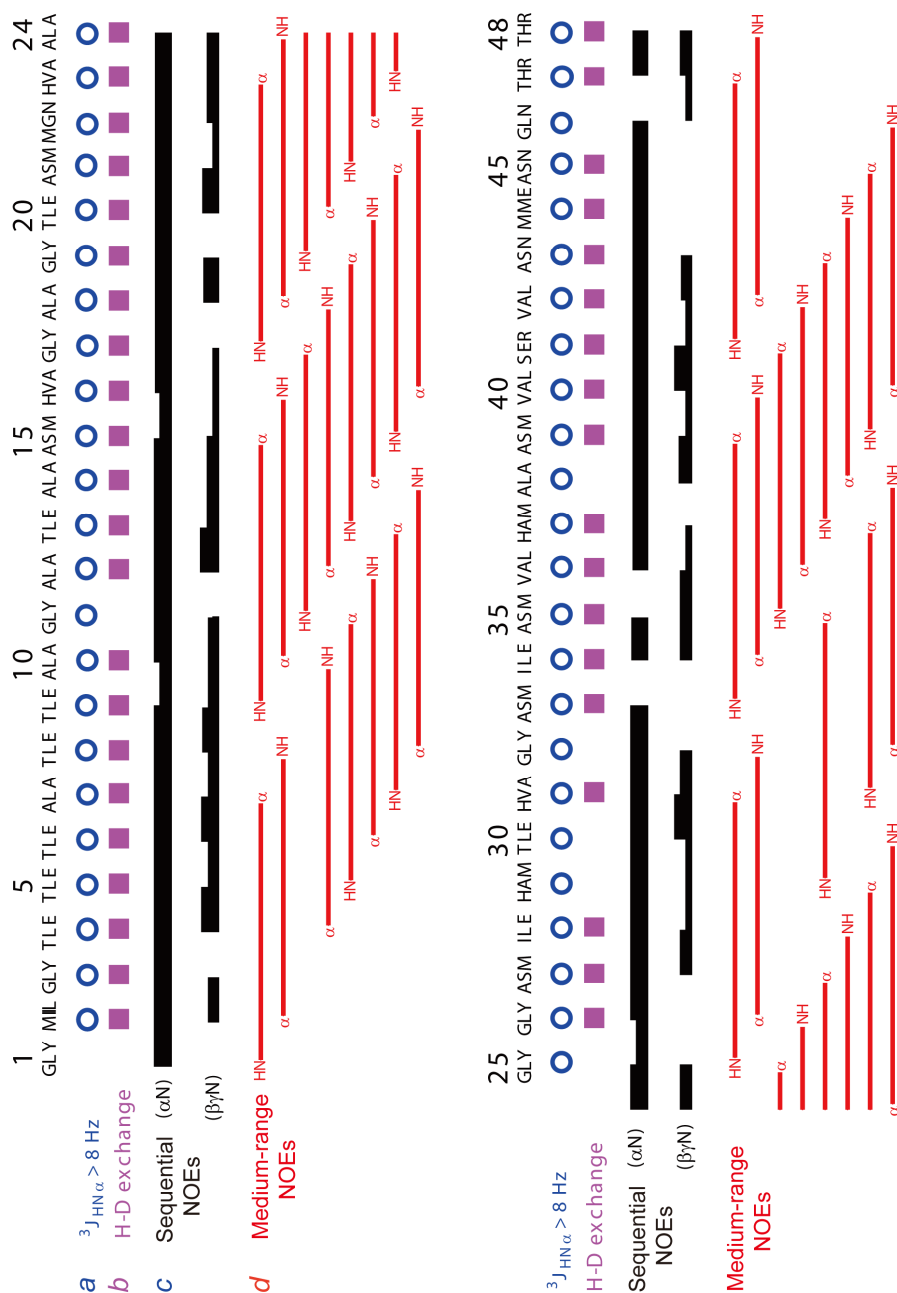

### Summary of secondary structure information.

(a)  $^3J_{\text{HN}\alpha}$  scalar coupling constant values between the backbone amide proton and the  $\alpha$  proton of each amino acid residue. Circles indicate coupling constants larger than 8 Hz. (b) Summary of the deuterium exchange experiment. Filled squares indicate slowly exchanging backbone amide protons in pTB whose TOCSY signals were still detectable 9.5 hours after the solubilization of pTB in  $\text{CDCl}_3/\text{CD}_3\text{OD}$  (1:1, v/v). (c) Sequential NOE connectivities. Thin, medium, and thick lines indicate weak, medium, and strong NOE peak intensities, respectively. (d) Medium-range NOE connectivities between backbone amide protons (HN) and  $\alpha$  protons ( $\alpha$ ).

Figure S6

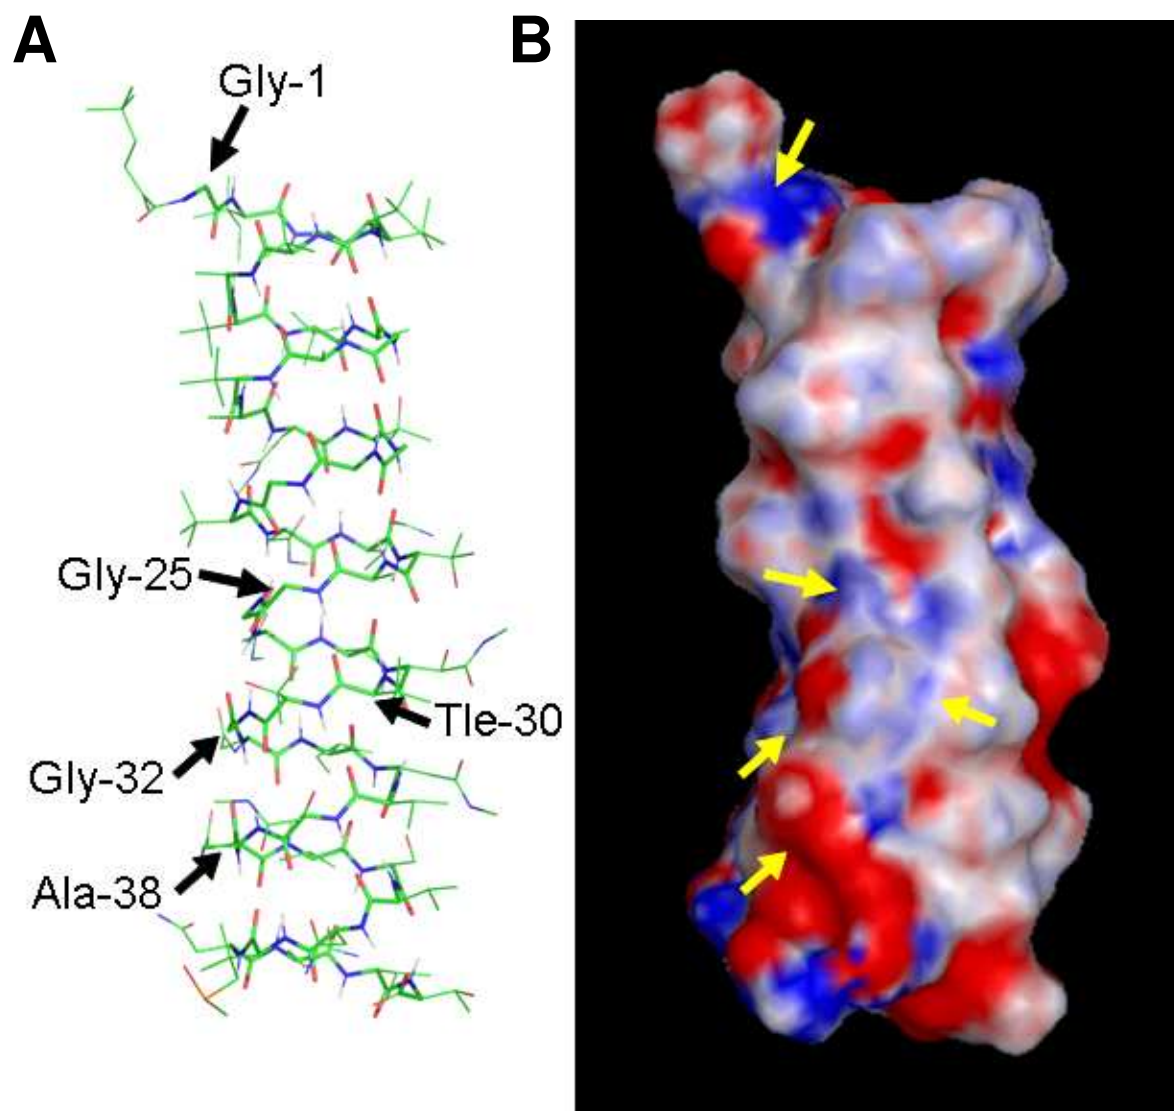

**A. Representation of the solution structure of pTB.** Five residues with fast backbone amide proton exchange are labeled.

**B. Electrostatic surface potential of pTB depicted in the same orientation as in A.** The positions of the five residues in A indicated by arrows.



**Figure S7**

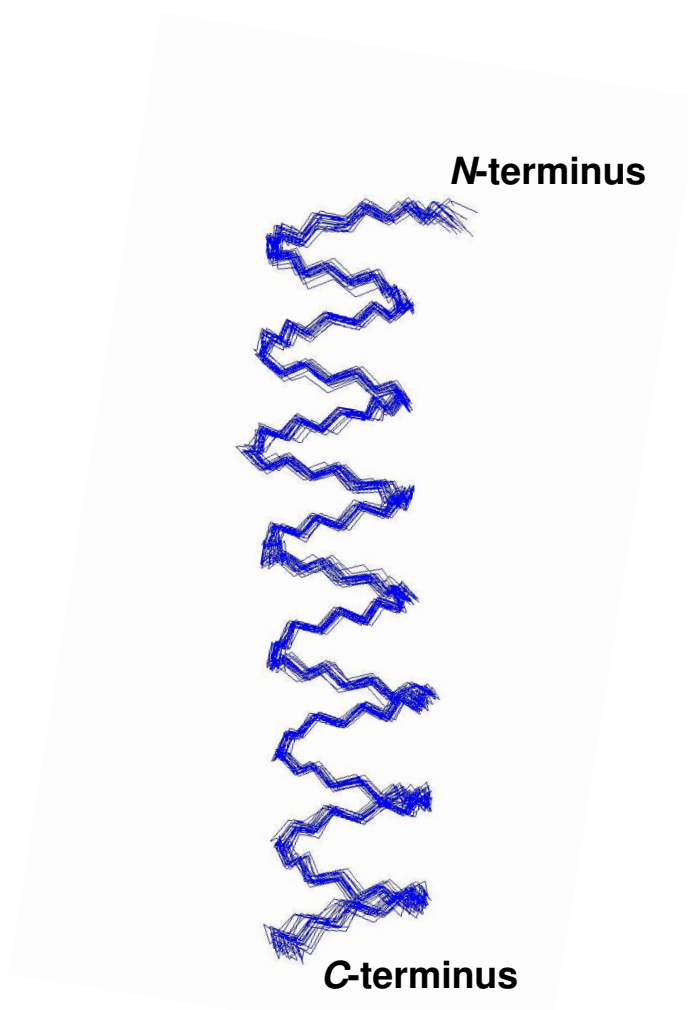

**Representation of the final 20 conformers of pTB after optimal superposition of the backbone heavy atoms of residues 3 to 44.**

Figure S8

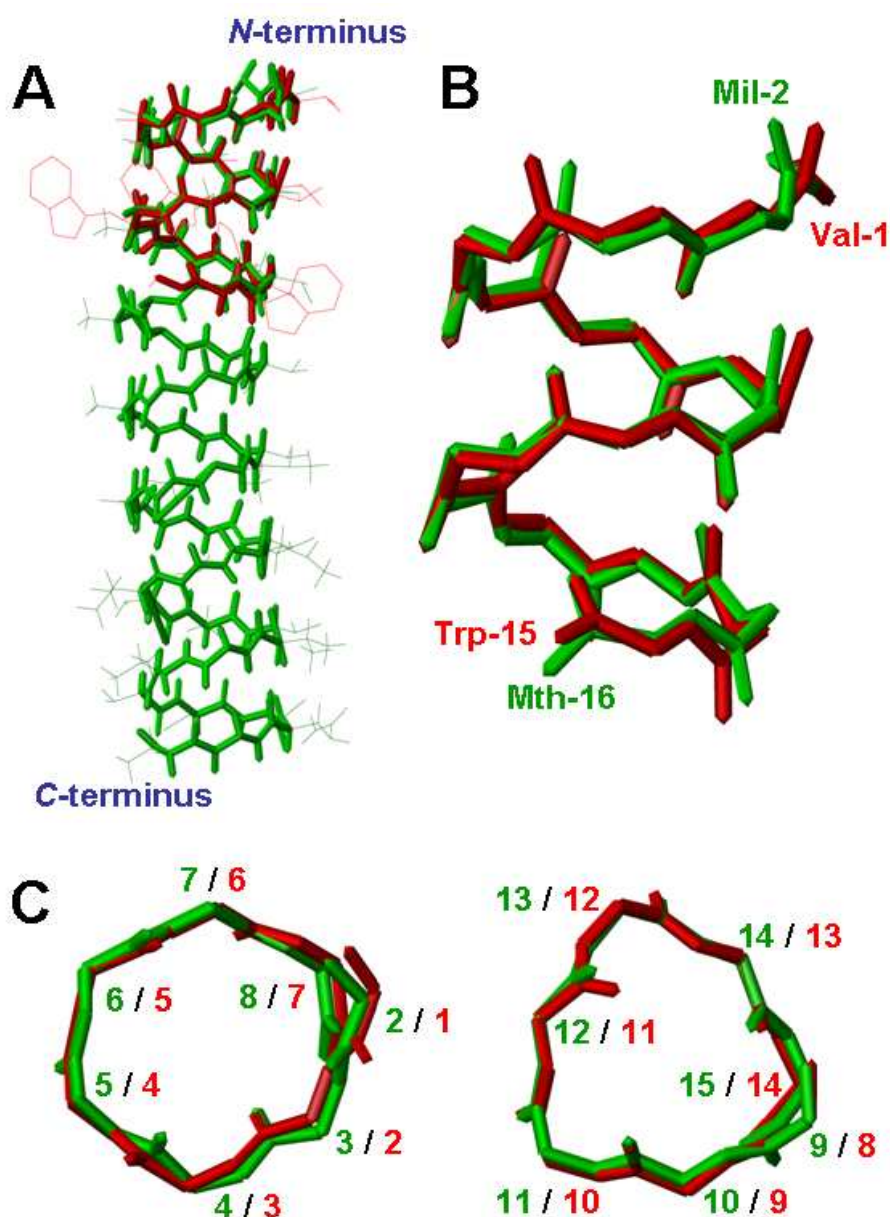

The backbone heavy atom superposition of residues 3 to 15 in pTB (green) with residues 2 to 14 in gA (red; PDB accession code 1JNO).<sup>12b</sup> The RMSD value between the mean coordinates is 0.30 Å for the backbone atoms in the above-mentioned region. **A.** Side view showing the complete structures of pTB and gA. **B.** Side view of the superimposed region in A. **C.** Top views of the superimposed region in A.
